# Supplementary material for: Tumor-associated B7-H1 promotes T-cell apoptosis: A potential mechanism of immune evasion
Source: Springer Nature journal article supplement (doi:10.1038/nm730), 2002-06-24
Supplement: 41591_2002_BFnm730_MOESM1_ESM.pdf [file 41591_2002_BFnm730_MOESM1_ESM.pdf]

Table 1. Expression of B7-H1 in human tumor cell lines

| Tissue origin | Cell line  | Pathology                 | B7-H1 expression* |                    |
|---------------|------------|---------------------------|-------------------|--------------------|
|               |            |                           | Medium            | IFN- $\gamma^{**}$ |
| Lung          | SK-LU-1    | Adenocarcinoma            | -                 | -                  |
|               | SK-MES-1   | Squamous carcinoma        | +                 | ND                 |
|               | NCI-H292   | Mucoepidermoid carcinoma  | ++                | ND                 |
|               | NCI-H128   | Small cell carcinoma      | -                 | -                  |
|               | NCI-H69    | Small cell carcinoma      | -                 | -                  |
|               | SCC-37     | Small cell carcinoma      | -                 | +                  |
|               | SCC-9      | Small cell carcinoma      | -                 | -                  |
|               | SCC-18     | Small cell carcinoma      | +                 | +                  |
|               | SCC-117    | Small cell carcinoma      | ++                | ND                 |
| Ovary         | CaOV3      | Adenocarcinoma            | ++                | ND                 |
|               | NIH-OVCAR3 | Adenocarcinoma            | -                 | ND                 |
|               | SK-OVCA3   | Adenocarcinoma            | -                 | ++                 |
| Colon         | SW620      | Colorectal adenocarcinoma | -                 | +                  |
|               | WiDr       | Colorectal adenocarcinoma | -                 | +                  |
|               | HT-29      | Colorectal adenocarcinoma | -                 | ++                 |
| Duodenum      | HuTu 80    | Adenocarcinoma            | -                 | +                  |
| Leukemia      | U937       | Monocyte                  | -                 | +                  |
| lymphoma      | K562       | Erythromyeloblast         | -                 | -                  |
|               | Jurkat     | T lymphocyte              | -                 | -                  |
|               | Molt 4     | T lymphocyte              | -                 | ND                 |
|               | Raji       | B lymphocyte              | -                 | +                  |
| Placenta      | JAR        | Choriocarcinoma           | -                 | +                  |
|               | Bewo       | Choriocarcinoma           | -                 | -                  |
| Skin          | SK-MEL-28  | Melanoma                  | -                 | ++                 |
|               | HT-144     | Metastatic melanoma       | -                 | +                  |
|               | 624mel     | Melanoma                  | -                 | -                  |
|               | 697mel     | Melanoma                  | -                 | -                  |

---

|        |          |   |   |
|--------|----------|---|---|
| 888mel | Melanoma | - | - |
| 586mel | Melanoma | - | + |

---

\* The expression of B7-H1 was determined by FACS analysis using anti-B7-H1 mAb.  
++: >50% positive, +: 10-50% positive, -: <10% positive, ND: not done.

\*\* Cells were incubated with 2,000 IU/ml of recombinant human IFN- $\gamma$  for 24-48 hours before FACS analysis.
