# Supplementary material for: Tumor-associated B7-H1 promotes T-cell apoptosis: A potential mechanism of immune evasion
Source: Springer Nature journal article supplement (doi:10.1038/nm730), 2002-06-24
Supplement: 41591_2002_BFnm730_MOESM2_ESM.pdf [file 41591_2002_BFnm730_MOESM2_ESM.pdf]

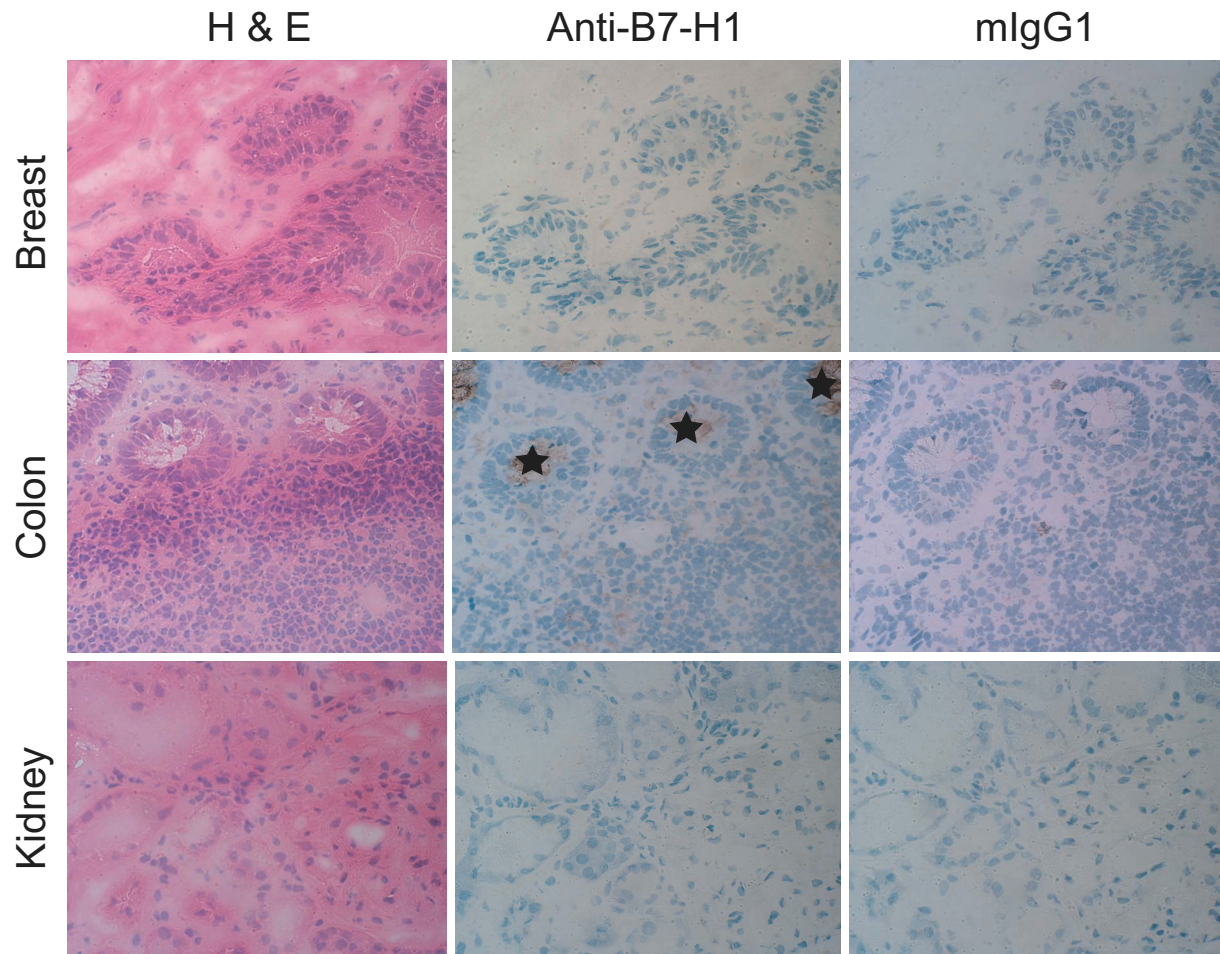

★ Mucus in the goblet cells show spurious stain

Supplemental Fig. A: No B7-H1 expression in normal human breast, colon and kidney. Snap-frozen specimens of human tissues from normal breast, colon and kidney were examined immunohistochemically using 5H1 mAb or control mouse IgG1. The adjacent sections were also stained with hematoxylin and eosin (H&E) for comparison.
