# Supplementary material for: Tumor-associated B7-H1 promotes T-cell apoptosis: A potential mechanism of immune evasion
Source: Springer Nature journal article supplement (doi:10.1038/nm730), 2002-06-24
Supplement: 41591_2002_BFnm730_MOESM3_ESM.pdf [file 41591_2002_BFnm730_MOESM3_ESM.pdf]

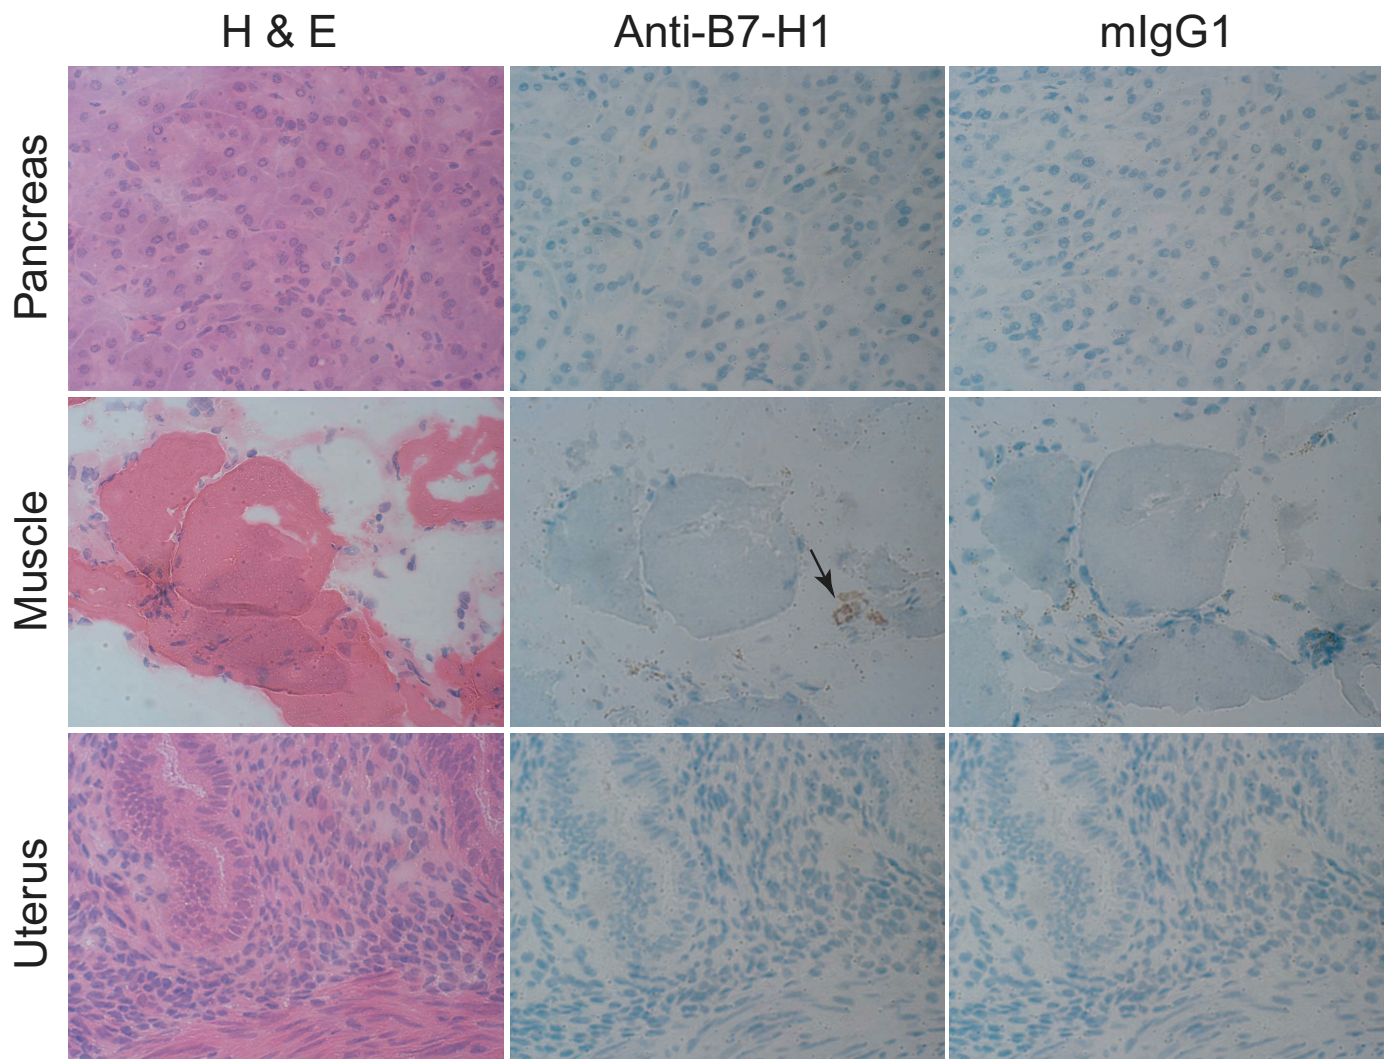

Supplemental Fig. B: No B7-H1 expression in the parenchyma of normal human pancreas, muscle and uterus. Snap-frozen specimens of human tissues from normal pancreas, muscle and uterus were examined immunohistochemically using 5H1 mAb or control mouse IgG1. The adjacent sections were also stained with hematoxylin and eosin (H&E) for comparison. Arrow indicated the macrophages positively stained with anti-B7-H1.
