# Supplementary material for: Tumor-associated B7-H1 promotes T-cell apoptosis: A potential mechanism of immune evasion
Source: Springer Nature journal article supplement (doi:10.1038/nm730), 2002-06-24
Supplement: 41591_2002_BFnm730_MOESM4_ESM.pdf [file 41591_2002_BFnm730_MOESM4_ESM.pdf]

**Supplemental Figure C. Costimulation of B7-H1 was not blocked by the PD-1 Ig**

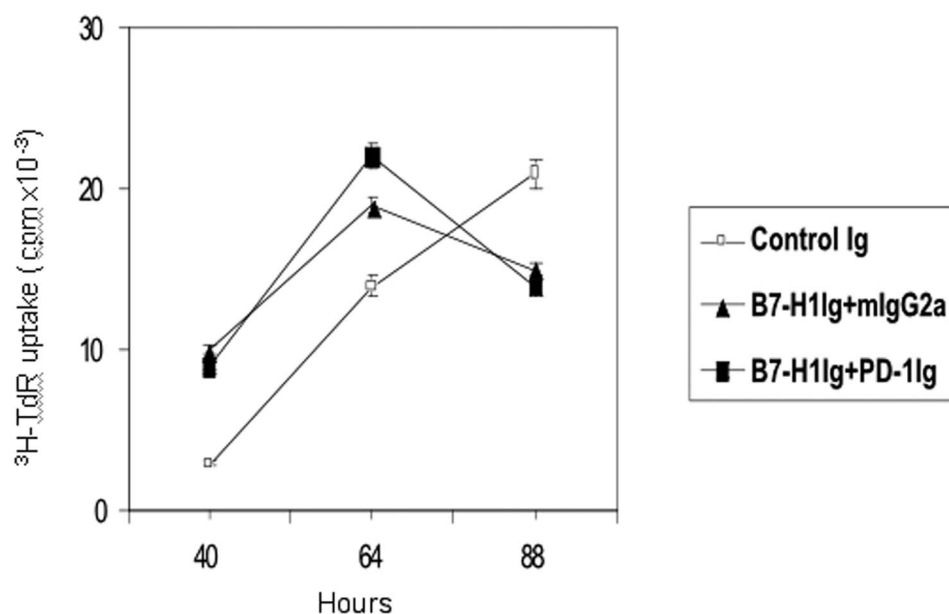

Supplemental Fig. C: PD-1Ig did not block the costimulation of B7-H1. Purified human T cells ( $2 \times 10^5$ /well) were cultured for 40, 64, and 88 hours with immobilized control Ig (mIgG2a) or B7-H1 Ig at  $10 \mu\text{g/ml}$  in the presence of suboptimal dose of anti-CD3. The blockade of B7-H1Ig with control Ig (mIgG2a) or PD-1Ig was added at  $30 \text{ mg/ml}$  at 30 min before the co-culture with T cells. T cells were pulsed with  $^3\text{H-TdR}$  for the final 18 hour before harvest. The proliferation of T cells was analyzed by the thymidine incorporation.
